# Supplementary material
Source: HighWire-hosted journal article supplement (https://jnm.snmjournals.org/highwire/filestream/101963/field_highwire_adjunct_files/0/251561_Supplemental_Data.pdf)
Supplement: 251561_Supplemental_Data.pdf [file 251561_Supplemental_Data.pdf]

**Supplemental table 1.** Imaging features of the primary UrC-ADC tumors on CECT and <sup>18</sup>F-FDG PET

| <b>Features on CECT</b>                                             | <b>(n=17)</b> | <b>(%)</b> |
|---------------------------------------------------------------------|---------------|------------|
| Well or ill-defined                                                 |               |            |
| Well-defined                                                        | 14            | 82         |
| Ill-defined                                                         | 3             | 18         |
| Solid or cystic                                                     |               |            |
| Cystic                                                              | 7             | 41         |
| Solid                                                               | 4             | 24         |
| Mixed (solid-cystic)                                                | 6             | 35         |
| Enhancement                                                         |               |            |
| Yes                                                                 | 15            | 88         |
| No                                                                  | 2             | 12         |
| Calcification                                                       |               |            |
| Yes                                                                 | 13            | 76         |
| No                                                                  | 4             | 24         |
| <b>Features on FDG PET/CT</b>                                       | <b>(n=11)</b> |            |
| FDG avid                                                            |               |            |
| Yes                                                                 | 7             | 64         |
| No                                                                  | 4             | 36         |
| SUV <sub>max</sub> of 7 avid primaries (median 13.8, range 4 -27.5) |               |            |
